# Supplementary material
Source: Springer Nature journal article supplement (https://www.springermedizin.de/resource/supplementary/12974_2011_472_MOESM3_ESM.pdf/9601344)

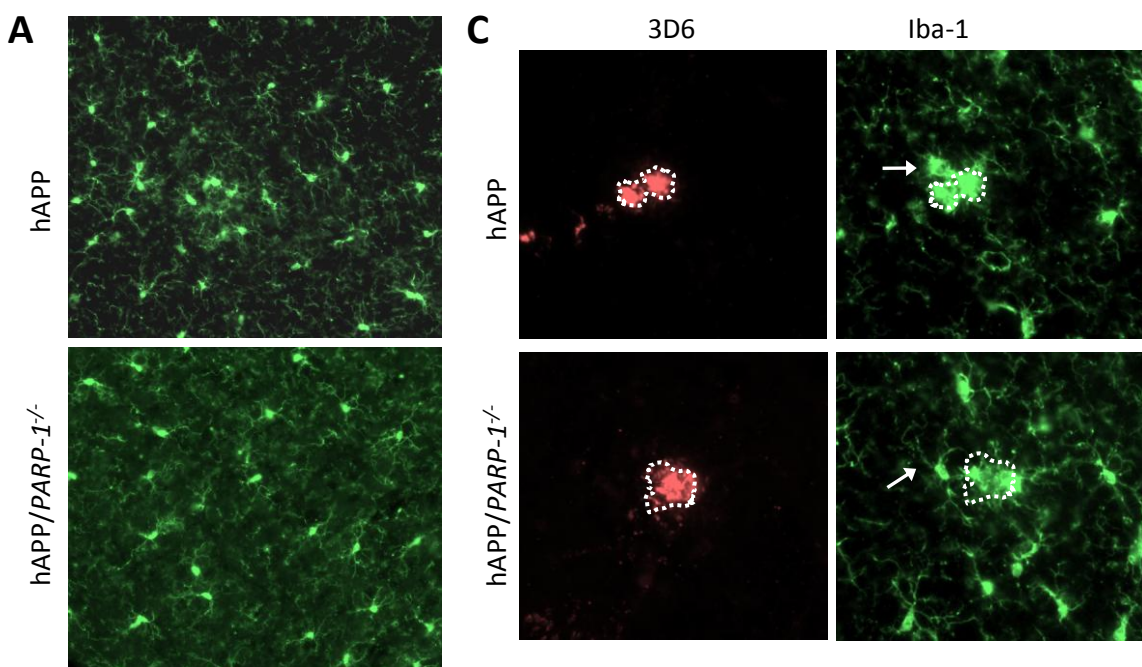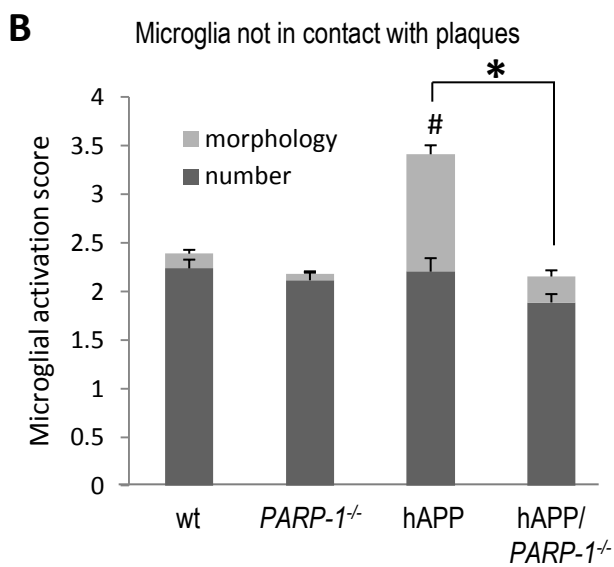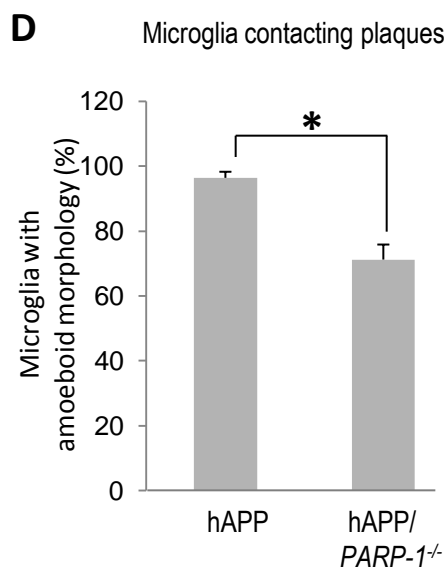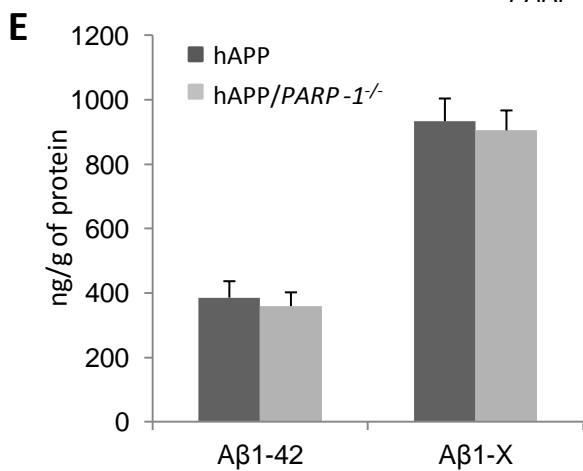

Supplement: MOESM3 [file 9601344]
